# Supplementary material
Source: HighWire-hosted journal article supplement (https://fn.bmj.com/content/105/3/253)
Supplement: inline-supplementary-material-6 [file inline-supplementary-material-6.xlsx]

## Sheet: vent_measure_stats_indiv_sel
			PIP (cmH2O)				PEEP (cmH2O)				MAP (cmH2O)				VTi (mL/kg)				VTe (mL/kg)				Leak (%)				MV (L/min/kg)
Recording	Weight (g)	Data points	Mean	25th pc	Median	75th pc	Mean	25th pc	Median	75th pc	Mean	25th pc	Median	75th pc	Mean	25th pc	Median	75th pc	Mean	25th pc	Median	75th pc	Mean	25th pc	Median	75th pc	Mean	25th pc	Median	75th pc
AL000008	3230	3121	6.53	6.3	6.5	6.8	5.06	5	5	5.1	4.96	4.9	5	5	5.37	4.74	5.29	5.82	5.15	4.46	5.08	5.63	0	0	0	0	0.25	0.22	0.24	0.28
AL000011	2660	2661	15.54	15.4	15.7	16	5.97	5.7	6	6.2	7.92	7.9	8	8.1	4.88	4.59	4.89	5.19	4.35	3.98	4.32	4.66	0.06	0	0	0	0.32	0.29	0.32	0.34
AL000023	2100	1470	6.56	6	6.7	7	5.72	5.2	6	6.1	5.63	5	6	6	4.93	4.43	4.86	5.43	3.33	2.9	3.29	3.86	34.9	29	38	43	0.15	0.1	0.12	0.19
AL000034	2320	2671	15.61	14.3	16	17.6	6.28	6	6.3	6.6	10.43	9.7	10.7	11.6	4.29	4.14	4.27	4.44	4.09	3.84	4.14	4.35	0.52	0	0	0	0.32	0.31	0.32	0.33
AL000036	560	1981	15.07	13.7	15.1	16.6	6.07	6	6.1	6.1	8.57	8.3	8.7	9.1	4.08	3.75	3.93	4.11	4.02	3.75	3.75	3.93	0.02	0	0	0	0.2	0.18	0.2	0.21
AL000038	690	2415	19.62	19.7	19.8	19.9	6.09	6.1	6.1	6.1	9.61	9.7	9.9	9.9	16.51	8.26	18.99	24.2	1.4	0.72	1.3	1.88	71.42	73	90	90	0.07	0.04	0.06	0.09
AL000048	2510	1613	13.5	13.1	13.4	13.9	4.99	4.9	5	5.1	7	6.9	7	7.1	5.49	5.42	5.5	5.54	5.39	5.42	5.46	5.54	0.12	0	0	0	0.22	0.22	0.22	0.22
AL000052	1225	3069	16.1	14.2	17.1	18.8	5.78	5.5	5.9	6.1	8.48	8.1	8.8	9.2	5.42	4.73	5.06	5.39	4.08	3.51	3.92	4.41	0.28	0	0	0	0.28	0.26	0.27	0.3
AL000055	3950	2670	18.79	15.8	19.65	23.2	6.37	6	6.5	6.88	11.44	9.6	12	13.6	3.95	3.7	3.92	4.1	3.87	3.62	3.87	4.05	0.01	0	0	0	0.33	0.32	0.34	0.35
AL000056	2750	4200	10.2	6.7	9.2	13.2	4.98	4.8	5	5.1	5.96	5.2	5.8	6.7	4.43	3.96	4.25	4.8	3.72	3.24	3.75	4.15	5.88	0	0	10	0.22	0.18	0.21	0.24
AL000057	3200	1500	22.88	19.9	22.6	25.6	4.97	4.9	5	5.1	8.77	8.1	8.7	9.3	5.43	5.22	5.53	5.69	5.26	5	5.47	5.62	1.22	0	0	0	0.19	0.19	0.19	0.2
AL000061	900	885	18.36	16.4	18.3	19.8	4.94	5	5	5	7.81	7.9	8.4	8.7	7.54	7.33	7.67	7.89	7.19	7.22	7.67	7.89	1.9	0	0	0	0.35	0.37	0.37	0.38
AL000064	2950	1276	18.05	14.5	18.3	20.6	4.99	4.9	5	5.1	7.51	7.2	7.5	7.8	5.98	5.86	6	6.1	5.57	5.32	5.66	5.97	1.16	0	0	0	0.23	0.19	0.21	0.25
AL000066	650	677	24.52	24.8	25	25.1	5.65	5	6	6.1	9.95	10.2	10.3	10.4	6.18	5.85	6.62	7.08	5.47	5.08	5.69	6.31	12.49	8	13	16	0.21	0.2	0.22	0.24
AL000067	1490	4074	19.59	17.5	19.6	21.9	5.77	5.5	5.7	6	8.84	8.4	9	9.5	4.6	4.56	4.7	4.77	3.66	3.42	3.69	3.96	0.04	0	0	0	0.32	0.31	0.33	0.35
AL000074	2750	3179	7.37	6.1	7	8	5.56	4.9	5.6	6	4.91	4.5	5	5.2	8.24	7.2	7.78	8.98	7.68	6.8	7.38	8.29	1.78	0	0	0	0.44	0.41	0.43	0.47
AL000089	690	1732	12.11	10.5	13	14.3	4.92	4.9	5	5	6.1	5.9	6.3	6.4	8.27	6.09	6.96	7.39	5.77	5.33	5.65	6.09	2.72	0	0	0	0.34	0.32	0.34	0.35
AL000090	3650	3315	15.54	12.9	14.6	19.6	5.23	5	5.2	5.5	7.01	6.4	6.9	7.8	4.93	4.68	5.07	5.23	3.69	3.26	3.73	4.08	0.23	0	0	0	0.31	0.28	0.31	0.33
AL000098	3100	846	17.59	16.4	17.9	19.4	5.31	5.1	5.3	5.5	6.04	6	6.1	6.2	7.06	6.35	7.1	7.84	3.05	2.71	3.06	3.42	36.07	27	36	45	0.18	0.14	0.18	0.21
AL000099	830	982	9.3	6.3	6.8	11.6	5.15	4.8	4.9	5	6.27	5.2	5.6	6.8	7.03	6.39	7.11	7.71	6.92	6.14	6.99	7.59	0.58	0	0	0	0.36	0.32	0.36	0.4
AL000101	1890	682	18.31	18	18.4	18.9	6.02	6	6.1	6.1	9.4	9.1	9.3	9.5	6.32	6.24	6.3	6.46	6.19	6.19	6.3	6.3	1.77	0	0	0	0.27	0.25	0.25	0.27
AL000103	4700	2966	22.47	21.4	23	23.6	3.02	3	3	3.1	7.74	7.5	7.8	8	6.99	7.11	7.19	7.21	6.93	7.06	7.17	7.21	0.27	0	0	0	0.25	0.25	0.25	0.26
AL000104	990	4258	8.45	7	7.9	8.7	6.52	6.1	6.5	6.9	6.81	5.9	6.9	7.1	5.2	4.75	5.05	5.45	5.04	4.55	4.95	5.25	0.09	0	0	0	0.48	0.45	0.47	0.51
AL000105	3400	2789	16.06	13.2	15.6	19.3	4.78	4.6	4.7	4.9	7.31	6.2	7.1	8.5	4.81	4.38	4.59	5.03	3.7	3.21	3.59	4.12	7.73	0	0	13	0.24	0.22	0.24	0.26
AL000106	3430	1838	8.08	6.7	7.4	9	4.77	4.6	4.8	4.9	5.1	5	5.1	5.3	4.58	4.23	4.49	4.72	4.22	3.91	4.2	4.46	0	0	0	0	0.29	0.27	0.29	0.31
AL000110	990	2701	18.72	16.4	19.9	21.8	6.23	6	6.1	6.2	10.25	9.7	10.4	10.9	7.62	4.95	6.26	10.51	4	3.43	4.14	4.55	33.32	0	26	67	0.24	0.19	0.24	0.29
AL000113	2400	7099	14.28	9.8	14.6	18.4	5.88	5.8	6	6.1	7.88	6.7	8.1	9.1	5.55	4.92	5.38	5.96	4.97	4.29	4.96	5.58	0.13	0	0	0	0.31	0.28	0.3	0.34
AL000115	800	3830	20.66	20.1	21.7	22	6.2	6	6.1	6.1	10.35	10	10.5	10.8	5.05	4.75	5	5.25	4.91	4.62	4.88	5.12	0.36	0	0	0	0.25	0.24	0.25	0.26
AL000116	600	2219	15.99	13.9	16.7	18.8	6.29	6	6.1	7	9.44	9	9.7	10.4	8.39	5.5	6	6.83	6.04	5.33	5.83	6.67	1.34	0	0	0	0.34	0.3	0.35	0.38
AL000118	990	3091	18.29	17.7	18.4	19	5.5	5.4	5.5	5.6	8.43	8.4	8.7	8.9	7.66	7.47	7.88	8.08	6.71	5.96	6.97	7.58	2.53	0	0	7	0.37	0.34	0.38	0.42
AL000119	1200	1621	15.89	13.8	15.9	17.9	5.45	5.3	5.4	5.6	8.02	7	7.5	9.4	5.82	5.08	5.58	6.25	4.7	4.17	4.75	5.17	0.48	0	0	0	0.39	0.36	0.4	0.43
AL000120	700	5460	11.57	9.3	11.9	13.8	6.06	6	6.1	6.1	7.79	7.1	7.9	8.6	3.66	3.29	3.57	3.86	3.37	3	3.29	3.57	5.91	0	6	11	0.19	0.16	0.18	0.22
AL000121	2030	3537	18.07	17.5	17.9	18.4	6.01	6	6.1	6.1	8.14	8.1	8.2	8.4	7.27	7.19	7.29	7.39	7.21	7.14	7.29	7.34	0.2	0	0	0	0.23	0.22	0.22	0.23
AL000123	3070	871	12.82	12.3	13.6	13.9	5.79	5.7	5.8	6	8	7.7	8.2	8.4	6.75	5.41	6.38	7.18	5.62	4.33	5.47	6.42	12.66	0	14	20	0.36	0.31	0.34	0.39
AL000144	3610	3091	6.85	5.3	6.8	8	2.91	2.8	2.9	3	3.9	3.6	3.9	4.1	3.79	3.3	3.46	3.82	3.57	3.24	3.43	3.77	0.17	0	0	0	0.25	0.23	0.26	0.27
AL000146	2060	1531	18.43	15.5	18	21.4	7.41	6.9	7.2	8	9.83	9	9.8	10.8	5.1	4.76	5.1	5.44	4.44	4.08	4.42	4.85	0.17	0	0	0	0.29	0.27	0.29	0.31
AL000148	1110	1321	12.64	10.4	12.3	14.4	5.96	5.9	6	6.1	7.59	7.1	7.6	8	5.61	5.23	5.59	6.04	4.92	4.41	4.86	5.41	0.09	0	0	0	0.31	0.28	0.31	0.35
AL000149	2250	2191	11.95	9	12.4	14.7	4.95	4.9	5	5	6.75	6	6.9	7.6	4.59	4.31	4.4	4.8	4.53	4.31	4.4	4.67	0.15	0	0	0	0.2	0.18	0.2	0.21
AL000154	3350	2101	18.29	17.2	18.2	19.3	6.27	5.9	6.3	6.6	7.06	7	7	7.1	4.77	4.63	4.78	4.93	3.35	3.04	3.31	3.61	0	0	0	0	0.33	0.32	0.33	0.35
AL000158	2230	1422	19.43	19.1	19.4	19.8	5.78	5.7	5.8	5.8	10.21	10.2	10.2	10.4	7.95	7.94	7.98	8.03	7.95	7.94	7.98	8.03	0	0	0	0	0.48	0.48	0.48	0.48
AL000162	3730	2310	9.66	7.7	10	11.5	4.98	4.9	5	5.1	4.73	4	4.5	5.6	5.55	3.4	4.96	8.15	5.07	2.95	3.55	7.64	1.37	0	0	0	0.24	0.06	0.22	0.42
AL000165	1900	1381	19.01	16.7	19.2	21.8	5.11	5	5.1	5.2	7.2	6.9	7.3	7.6	4.45	4.16	4.37	4.58	2.88	2.53	2.74	3	0.14	0	0	0	0.28	0.26	0.27	0.28
AL000174	4200	1033	18.39	17	18	19.6	4.09	4	4.1	4.1	7.12	7	7.2	7.3	7.01	6.48	7.1	7.52	6.5	6	6.48	7.05	0.2	0	0	0	0.23	0.22	0.23	0.25
AL000176	600	1890	17.23	16	17.9	19.5	6.06	6	6.1	6.1	8.16	8	8.3	8.5	4.87	4.67	4.83	5	3.98	3.5	4	4.33	7.5	0	7	10	0.19	0.18	0.2	0.21
AL000179	4650	3000	7.26	6.3	6.7	7.4	4.96	4.9	5	5	5.1	5	5	5.1	4.42	4.09	4.34	4.67	4.28	3.98	4.24	4.56	0.21	0	0	0	0.16	0.15	0.16	0.17
AL000187	3640	1005	7.14	6.8	7.1	7.4	4.61	4.6	4.6	4.7	4.87	4.9	5	5	5.1	4.89	5.14	5.3	4.96	4.75	4.97	5.19	0.21	0	0	0	0.29	0.29	0.3	0.31
AL000188	2400	1350	20.24	19.3	20.2	21.5	5.89	5.8	5.8	6	11.73	11.2	11.8	12.4	5.08	4.92	5	5.21	4.98	4.83	4.96	5.13	0.01	0	0	0	0.37	0.36	0.37	0.38
AL000192	3110	2709	8.25	7.2	7.5	8.4	6	5.9	6	6.1	6.16	6	6.1	6.2	6.27	5.63	6.33	6.88	5.84	5.18	5.98	6.62	4.13	0	0	8	0.24	0.21	0.24	0.27
AL000193	1370	2580	18.7	18.2	19.4	20	6.06	6	6.1	6.1	8.54	8.4	8.7	8.9	5.15	5.04	5.11	5.18	4.76	4.45	4.96	5.11	0.89	0	0	0	0.2	0.17	0.18	0.21
AL000204	990	766	29.81	29.8	29.8	29.9	6.13	6	6.1	6.1	14.12	13.8	14	14.2	2.53	2.32	2.42	2.73	2.5	2.22	2.42	2.63	0	0	0	0	0.15	0.14	0.15	0.16
AL000212	1450	1828	22.06	19.6	22.2	24.5	5.98	5.9	6	6.1	11.59	10.8	11.7	12.4	4.1	4	4.14	4.21	4.06	3.93	4.07	4.21	0.01	0	0	0	0.25	0.25	0.26	0.26
AL000226	750	4791	20.12	19.1	20.3	21.5	6.06	6	6.1	6.1	11.27	10.8	11.3	11.9	4.05	3.87	4	4.13	4.01	3.87	3.87	4	0.15	0	0	0	0.27	0.25	0.27	0.29
AL000227	2300	1962	27.16	27.7	27.8	27.9	6.09	6	6.1	6.1	13.82	13.5	14.2	14.7	3.84	3.48	3.78	4.22	3.79	3.43	3.7	4.13	0.17	0	0	0	0.24	0.2	0.24	0.26
AL000229	3580	3016	18.13	15.5	18.6	21.2	6.04	5.9	6	6.1	8.32	7.8	8.5	8.9	5.02	4.66	4.94	5.34	4.16	3.55	4.02	4.66	0.29	0	0	0	0.26	0.25	0.27	0.29
AL000234	2170	1156	20.08	14.8	19.7	25.83	6	5.9	6	6.1	8.64	7.6	8.7	9.7	5.34	4.47	4.65	4.84	3.71	3.36	3.82	4.15	0.31	0	0	0	0.3	0.29	0.31	0.33
AL000239	3000	3111	9.63	7	8	11	5.46	5.5	5.5	5.6	6.18	5.6	6	6.6	2.89	2.73	2.93	3.1	2.72	2.57	2.8	3	0.82	0	0	0	0.12	0.11	0.12	0.13
AL000240	3100	3210	18.54	16.5	18	20.48	6.25	6	6.2	6.4	9.07	8.5	9	9.6	4.91	4.71	4.87	5.06	3.67	3.19	3.52	4	0.01	0	0	0	0.31	0.29	0.31	0.33
AL000241	3100	915	16.75	15.15	16.3	17.9	6.04	5.9	6.1	6.2	7.76	7.4	7.6	8	4.79	4.68	4.81	4.9	3.7	3.45	3.81	4	0.02	0	0	0	0.29	0.28	0.32	0.33
AL000244	2990	3690	11.03	11.1	11.8	12.4	5.86	6	6.1	6.1	6.21	6.4	6.5	6.5	4.8	4.21	4.28	4.92	4.21	3.71	4.25	4.72	4.07	0	0	7	0.1	0.06	0.07	0.14
AL000245	2400	2677	20.07	19.3	19.9	20.8	6.05	6	6.1	6.1	9.36	9.2	9.3	9.6	5.36	5.21	5.38	5.5	5.05	4.75	5.29	5.42	0.27	0	0	0	0.22	0.22	0.22	0.23
AL000246	640	3506	16.95	15.4	17.8	19.8	3.43	3.3	3.5	3.7	6.24	6.1	6.5	6.8	6.25	5.62	5.94	6.41	4.97	4.69	5	5.16	18.04	11	14	19	0.19	0.17	0.18	0.21
AL000247	3300	2731	8.7	7.2	7.8	9.6	4.6	4.3	4.5	4.7	3.89	3.7	3.7	4	4.21	3.91	4.21	4.42	3.59	3.42	3.61	3.82	0.02	0	0	0	0.29	0.28	0.29	0.3
AL000250	3360	1666	20.31	19.1	20.7	21.3	9.14	8	9.8	10	13.8	12.4	14.5	14.9	6.44	6.4	6.43	6.49	6.44	6.4	6.43	6.46	0	0	0	0	0.29	0.28	0.29	0.31
AL000251	3300	1860	20.92	20.2	20.8	21.5	7.88	7.8	7.9	8	13.25	12.9	13.4	13.7	6.89	6.58	6.94	7.24	6.89	6.58	6.91	7.24	0	0	0	0	0.37	0.35	0.37	0.4
AL000264	4300	3481	14.95	13.1	14.4	16.6	4.83	4.8	4.8	4.9	7.81	7.3	7.7	8.3	4.28	4.05	4.19	4.51	4.19	3.98	4.12	4.4	0.04	0	0	0	0.23	0.22	0.23	0.24
AL000267	625	4471	28.33	27.5	28.6	30.2	5.9	5.9	6.1	6.1	12.12	11.9	12.3	12.7	7.17	6.88	7.04	7.2	6.91	6.72	6.88	7.04	0.42	0	0	0	0.31	0.3	0.3	0.32
AL000268	1050	2699	11.13	6.4	9.5	14.7	5	4.9	5	5	5.96	5.2	5.9	6.5	5.94	5.33	5.9	6.48	5.37	4.67	5.33	6	3.18	0	0	0	0.21	0.17	0.21	0.26
AL000271	2040	601	9.3	8.3	9	10.3	6.88	6.8	6.9	7.1	6.86	6.8	7	7.1	5.85	4.66	5.2	6.86	5.29	4.31	4.85	5.78	0.26	0	0	0	0.24	0.22	0.23	0.25
AL000273	3450	1305	8.48	7	7.5	8.5	5.93	5.8	6	6.1	6.09	5.7	5.9	6.2	5	4.7	4.99	5.3	4.98	4.67	4.96	5.28	0.16	0	0	0	0.23	0.22	0.23	0.24
AL000274	3750	1440	14.09	8.9	15.5	18.9	5.84	5.7	5.9	6	8.61	5.9	9.6	10.8	5.22	4.88	5.2	5.28	5.05	4.83	5.17	5.26	0.63	0	0	0	0.33	0.32	0.33	0.35
AL000277	3040	2926	19.71	16.7	19.6	22.8	5.67	5.1	5.8	6.1	9.24	8.22	9.2	10.3	6	5.62	5.86	6.09	5.72	5.46	5.79	6.02	0.4	0	0	0	0.27	0.26	0.27	0.28
AL000279	1750	3210	8.87	7.1	7.6	8.7	6.11	5.9	6.1	6.3	6.6	5.8	6.1	6.6	5.89	4.69	5.71	6.74	5.73	4.57	5.54	6.63	0.11	0	0	0	0.37	0.32	0.37	0.41
AL000281	2150	1381	31.38	31.4	31.7	31.8	5.97	5.9	6	6.1	11.74	11.5	11.8	12	4.86	4.7	4.93	5.02	3.61	3.3	3.63	4	0.62	0	0	0	0.23	0.22	0.23	0.24
AL000283	2600	3915	22.02	19.6	21.9	23.7	6.03	5.8	6	6.1	7.95	7.7	7.9	8.2	7.95	7.58	7.81	8.15	6.01	5.46	6	6.5	0	0	0	0	0.38	0.35	0.38	0.4
AL000285	1840	1156	13.08	11.08	12.6	14.2	6.09	6	6.1	6.2	7.24	6.8	7.2	7.5	5.93	5.38	5.71	6.3	4.6	4.02	4.46	4.95	0.08	0	0	0	0.38	0.35	0.38	0.41
AL000286	2600	1777	19.84	20.4	21.1	21.5	4.1	4	4.1	4.2	7.63	7.6	7.9	8.1	6.02	6.04	6.12	6.15	5.96	6.04	6.12	6.15	0	0	0	0	0.25	0.24	0.25	0.25
AL000288	2690	746	17.49	13.6	17.75	20.9	5.11	5	5.2	5.3	6.9	6.1	7.2	7.8	5.12	4.98	5.17	5.39	3.69	3.09	3.53	4.13	0.01	0	0	0	0.33	0.31	0.33	0.36
AL000289	3360	1785	19.57	16	21	21.9	6.02	6	6.1	6.1	9.25	8.5	9.7	9.9	4.86	4.67	4.73	4.82	4.72	4.64	4.7	4.76	0.21	0	0	0	0.21	0.21	0.21	0.22
AL000291	3000	2694	10.56	7.6	10.9	12.4	4.89	4.8	4.9	5	6.43	5.7	6.7	7.2	5.85	5	5.5	6.17	5.31	4.37	4.97	5.57	6.77	0	0	12	0.27	0.25	0.26	0.29
AL000293	1640	1114	11.8	8.2	11.75	15.1	4.85	4.8	5	5.1	6.86	5.9	6.8	7.8	7.29	4.94	5.91	9.21	6.81	4.63	5.67	8.95	1.32	0	0	0	0.38	0.31	0.36	0.42
AL000295	2870	2187	23.27	14.8	17.3	31.4	2.99	2.8	2.9	3	8.5	6.6	7.4	10.6	5.07	4.39	4.6	5.57	4.22	3.87	4.36	4.53	11.86	0	0	22	0.29	0.26	0.28	0.32
AL000296	2700	2769	11.4	8.8	11.6	13.6	6.37	6.2	6.4	6.5	7.14	6.6	7.1	7.6	5.06	4.89	5.11	5.26	4.52	4.19	4.52	4.85	0.06	0	0	0	0.25	0.24	0.25	0.27
AL000300	2480	1276	36.92	33.3	36.6	41	7.09	6.8	7	7.3	16.45	15.9	16.7	17.3	5.26	5	5.26	5.56	4.65	4.35	4.64	5	0.57	0	0	0	0.36	0.34	0.37	0.39
